# Supplementary material
Source: PubMed Central journal article supplement (PMC8106629)
Supplement: NIHMS1673589-supplement-2.pdf [file NIHMS1673589-supplement-2.pdf]

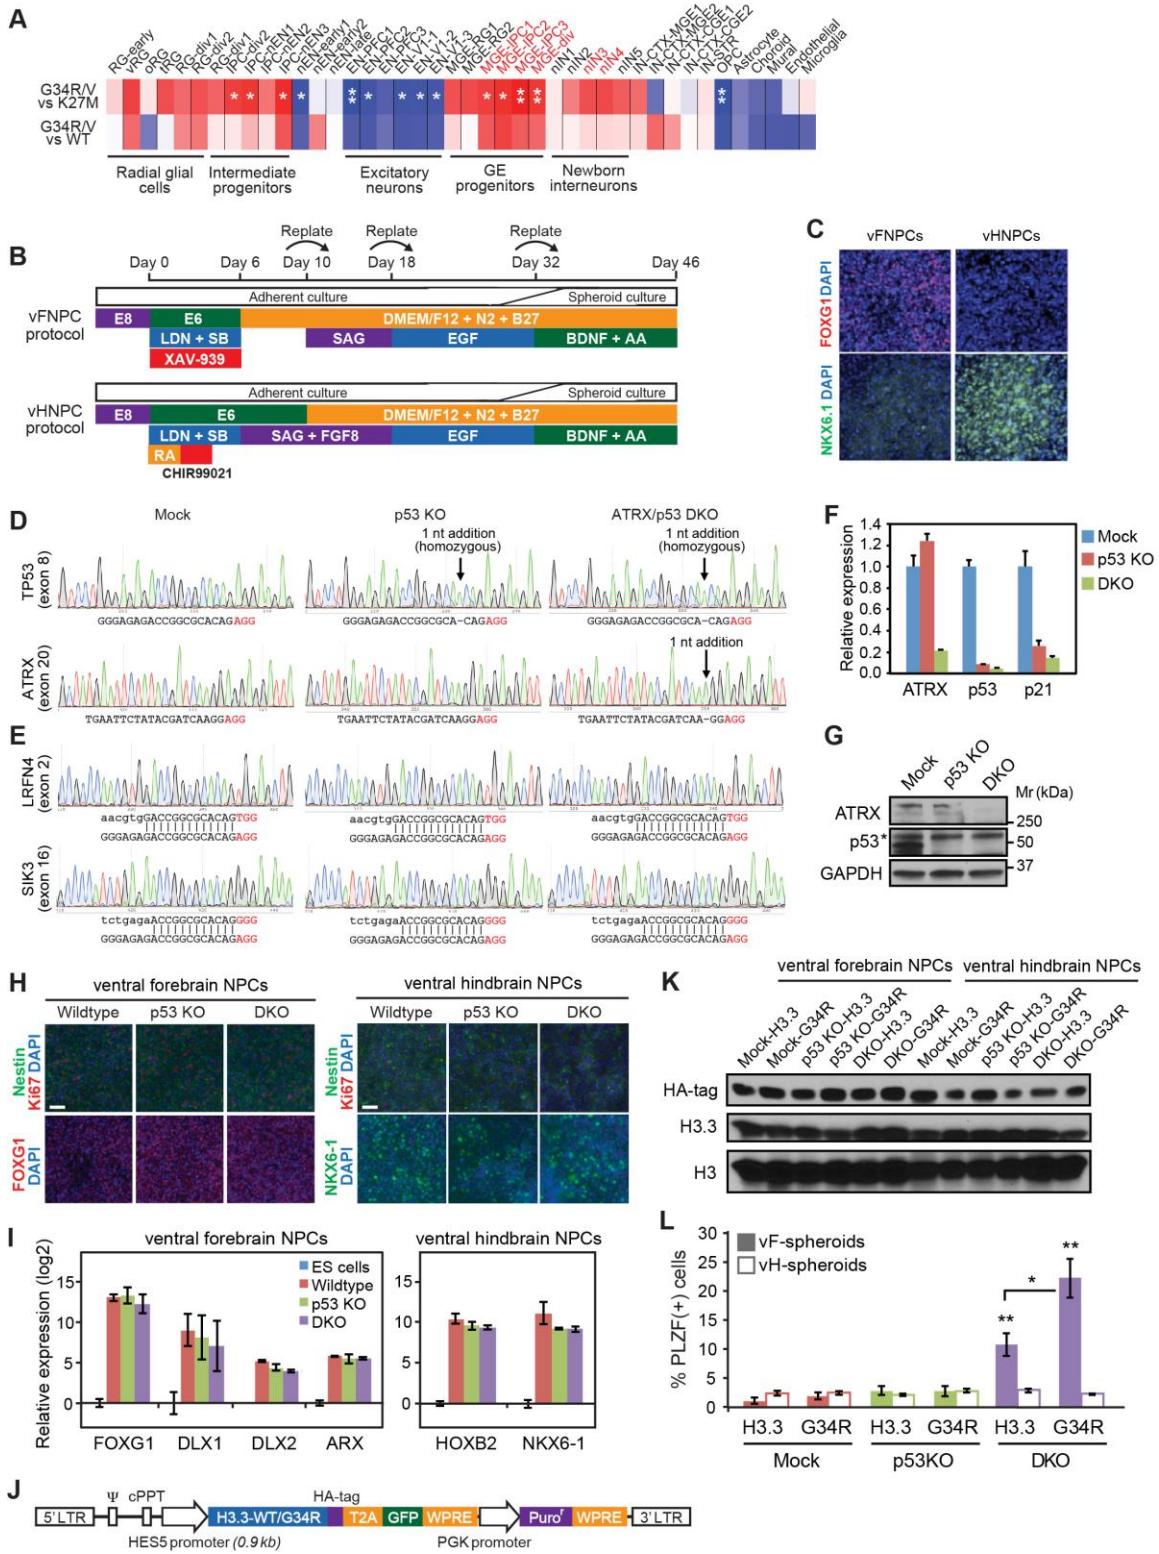

**Figure S1. Characterization of tumor model cells, related to Figure 1.**

(A) Heatmap shows enrichment (red) and depletion (blue) of expression signatures extracted from the indicated cell populations described in Nowakowski *et al.* *P* values were calculated by random permutation of sample labels ( $n = 1,000$ ) and adjusted for multiple comparisons. (B) Schematic illustration of differentiation protocols for vFNPCs (upper) and vHNPCs (lower). (C) Immunohistochemistry for forebrain marker FOXG1 and hindbrain marker NKX6.1 demonstrates their cell type-specific expression. (D) Mutations created by CRISPR/Cas9 gene editing were validated by Sanger sequencing of genomic DNA. Nucleotide sequences of guide RNAs are shown below. Red letters indicate the PAM sequence (NGG). (E) Sanger sequencing of genomic DNA shows that putative off-targets sites are unaffected. (F) RT-qPCR demonstrates the decreased expression of knocked-out genes and p53 target gene p21. Bars indicate mean  $\pm$  S.E.M. ( $n = 3$ ). (G) Western blotting confirmed the loss of expression of ATRX and p53. Asterisk indicates unspecific bands. (H) At day 18 of differentiation, vFNPCs and vHNPCs were immunostained with the indicated antibodies and counterstained with DAPI. Scale bar, 20  $\mu$ m. (I) RT-qPCR shows the expression of interneuron markers and hindbrain markers in each cell type. Bars indicate mean  $\pm$  S.E.M. ( $n = 3$ ). (J) Schematic illustration of H3.3-expressing construct. (K) Western blotting of chromatin fraction shows the expression of histone H3.3 transgenes and incorporation into chromatin. (L) Intracellular flow cytometry shows an increase of PLZF-positive early neuroectoderm cells in the ventral forebrain (vF) cultures but not in ventral hindbrain (vH) cultures. Bars indicate mean  $\pm$  S.E.M. ( $n = 4-5$ ). *P* values in panel (L) were calculated by two-sided Welch's *t* test. \**P* < 0.05, \*\**P* < 0.01.

**A**

| Mutations             | Cell type | # of animals that reached the humane endpoint at 6 months | Median survival (days) |
|-----------------------|-----------|-----------------------------------------------------------|------------------------|
| DKO + H3.3G34R + MYCN | Forebrain | 8/8 (100%)                                                | 99.5                   |
| DKO + H3.3WT + MYCN   | Forebrain | 3/8 (37.5%)                                               | >172.5                 |
| DKO + H3.3G34R + MYCN | Hindbrain | 0/7 (0%)                                                  | -                      |
| DKO + H3.3G34R        | Forebrain | 1/8 (12.5%)                                               | -                      |
| DKO + H3.3WT          | Forebrain | 0/8 (0%)                                                  | -                      |
| DKO + H3.3G34R        | Hindbrain | 0/5 (0%)                                                  | -                      |
| Mock NPCs             | Forebrain | 0/3 (0%)                                                  | -                      |

**B**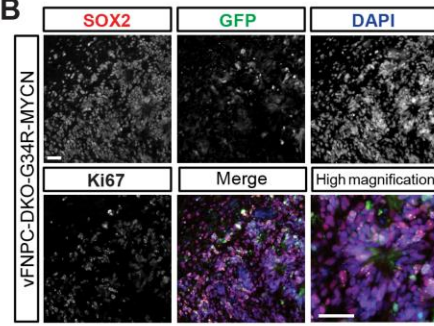**C**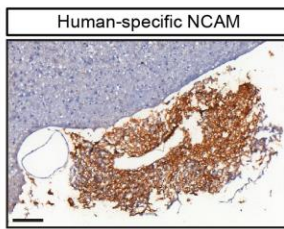**D**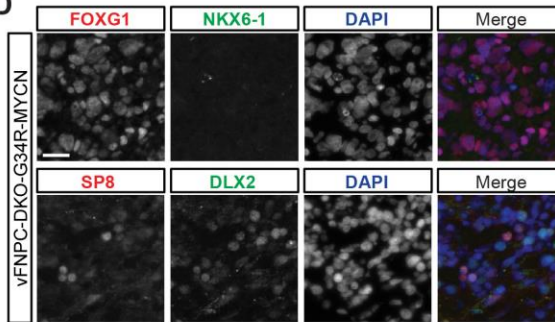**E**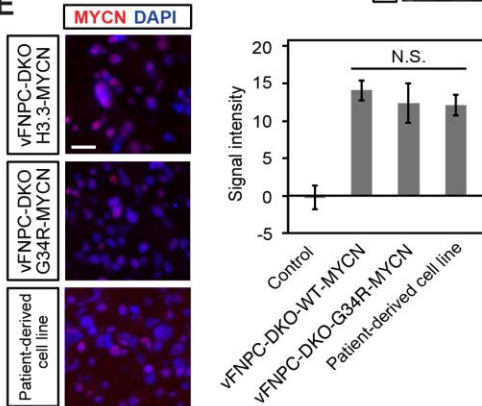**F**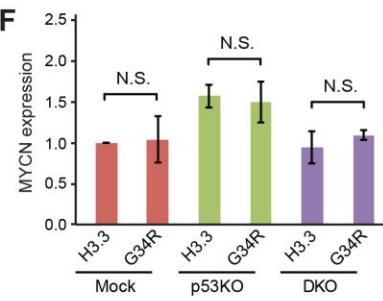**G**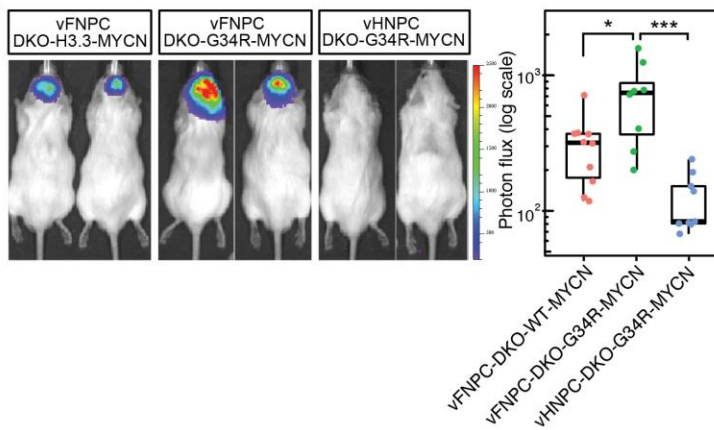**H**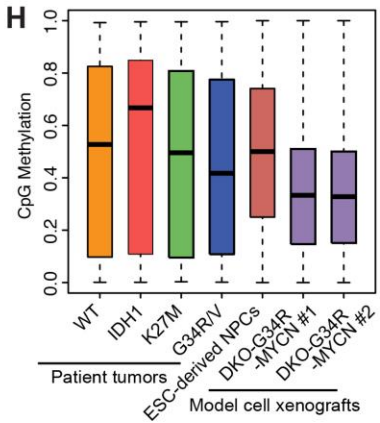

**Figure S2. Characterization of xenografts, related to Figure 2.**

(A) Summary of *in vivo* tumorigenicity assays. Mutation status and type of cells transplanted intracranially in NOD/SCID mice, and survival outcomes are shown. DKO: ATRX/TP53 double knockout, NPCs: Neural Progenitor Cells. (B) Frozen section of mouse brain transplanted with the quadruple-mutant cells (vFNPC-DKO-G34R-NMYC) was immunostained for SOX2 and Ki67. High-magnification image shows a representative rosette structure. Scale bar, 20  $\mu\text{m}$ . (C) DAB-staining for human NCAM shows leptomeningeal spread of transplanted cells. (D) Immunohistochemistry shows the maintained expression of interneuron markers in transplanted cells. Scale bar, 20  $\mu\text{m}$ . (E) Immunostaining for N-Myc shows similar expression levels in xenografts. Scale bar, 20  $\mu\text{m}$ . Signal intensity was calculated using Image J. Brain sections of non-grafted animals were used as control. Bars indicate mean  $\pm$  S.E.M. (n = 4). (F) RT-qPCR shows that H3.3G34R mutation does not affect the expression of N-Myc in vFNPCs. Bars indicate mean  $\pm$  S.E.M. (n = 4). (G) Intracranial growth of luciferase-labeled cells was measured by quantitative *in vivo* bioluminescence imaging. (n = 8-10) (H) Boxplot shows CpG methylation levels of the indicated groups. Each human patient tumor subtype consists of 4 samples. *P* values were calculated by two-sided Welch's t test (E, F) or by Wilcoxon rank-sum test (G). \**P* < 0.05, \*\*\**P* < 0.001. NS, Not Significant.





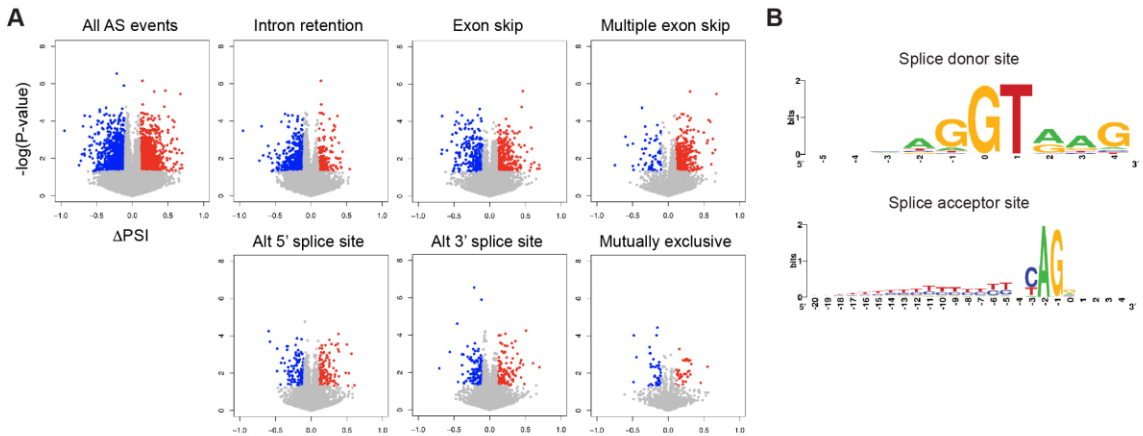

**C**

| Upregulated AS (All) |                                       |       |      |          |           |
|----------------------|---------------------------------------|-------|------|----------|-----------|
| Category             | Term                                  | Count | %    | P-Value  | Benjamini |
| UP_KEYWORDS          | Alternative splicing                  | 723   | 74.6 | 1.50E-64 | 6.00E-62  |
| UP_KEYWORDS          | Phosphoprotein                        | 601   | 62   | 3.80E-54 | 7.80E-52  |
| UP_SEQ_FEATURE       | splice variant                        | 564   | 58.2 | 3.60E-45 | 8.80E-42  |
| UP_KEYWORDS          | Nucleus                               | 378   | 39   | 1.90E-25 | 2.60E-23  |
| UP_KEYWORDS          | Cytoplasm                             | 349   | 36   | 2.20E-23 | 2.30E-21  |
| GOTERM_MF_DIRECT     | protein binding                       | 551   | 56.9 | 8.80E-18 | 7.70E-15  |
| GOTERM_CC_DIRECT     | nucleoplasm                           | 229   | 23.6 | 2.70E-17 | 1.80E-14  |
| UP_KEYWORDS          | Coiled coil                           | 231   | 23.8 | 1.80E-16 | 1.80E-14  |
| GOTERM_CC_DIRECT     | cytoplasm                             | 358   | 36.9 | 8.00E-15 | 2.30E-12  |
| GOTERM_BP_DIRECT     | G2/M transition of mitotic cell cycle | 30    | 3.1  | 2.60E-11 | 7.10E-08  |

| Downregulated AS (All) |                      |       |      |          |           |
|------------------------|----------------------|-------|------|----------|-----------|
| Category               | Term                 | Count | %    | P-Value  | Benjamini |
| UP_KEYWORDS            | Alternative splicing | 654   | 73.8 | 8.30E-59 | 3.30E-56  |
| UP_KEYWORDS            | Phosphoprotein       | 545   | 61.5 | 7.00E-50 | 1.40E-47  |
| UP_SEQ_FEATURE         | splice variant       | 519   | 58.6 | 6.40E-44 | 1.50E-40  |
| UP_KEYWORDS            | Cytoplasm            | 309   | 34.9 | 2.80E-19 | 3.30E-17  |
| UP_KEYWORDS            | Coiled coil          | 218   | 24.6 | 3.10E-18 | 3.10E-16  |
| GOTERM_MF_DIRECT       | protein binding      | 497   | 56.1 | 2.30E-17 | 1.90E-14  |
| GOTERM_CC_DIRECT       | cytoplasm            | 328   | 37   | 1.40E-15 | 7.90E-13  |
| UP_KEYWORDS            | Acetylation          | 214   | 24.2 | 2.70E-11 | 2.10E-09  |
| GOTERM_CC_DIRECT       | nucleoplasm          | 185   | 20.9 | 6.20E-10 | 1.70E-07  |
| UP_KEYWORDS            | Cytoskeleton         | 88    | 9.9  | 1.00E-08 | 6.60E-07  |

| Upregulated AS (IR) |                      |       |      |          |           |
|---------------------|----------------------|-------|------|----------|-----------|
| Category            | Term                 | Count | %    | P-Value  | Benjamini |
| UP_KEYWORDS         | Alternative splicing | 117   | 66.5 | 2.20E-08 | 5.10E-06  |
| UP_KEYWORDS         | Phosphoprotein       | 97    | 55.1 | 1.70E-07 | 2.00E-05  |
| UP_KEYWORDS         | Nucleus              | 69    | 39.2 | 1.40E-06 | 1.10E-04  |
| UP_SEQ_FEATURE      | splice variant       | 89    | 50.6 | 5.10E-06 | 3.00E-03  |
| GOTERM_CC_DIRECT    | nucleoplasm          | 44    | 25   | 3.40E-05 | 7.50E-03  |
| GOTERM_CC_DIRECT    | nucleus              | 69    | 39.2 | 7.60E-05 | 8.50E-03  |
| UP_KEYWORDS         | Acetylation          | 45    | 25.6 | 3.10E-04 | 1.80E-02  |
| UP_KEYWORDS         | Cytoplasm            | 57    | 32.4 | 4.90E-04 | 2.30E-02  |
| GOTERM_MF_DIRECT    | protein binding      | 87    | 49.4 | 1.10E-03 | 2.70E-01  |
| GOTERM_MF_DIRECT    | poly(A) RNA binding  | 20    | 11.4 | 1.10E-03 | 1.50E-01  |
| GOTERM_CC_DIRECT    | spliceosomal complex | 6     | 3.4  | 1.20E-03 | 8.40E-02  |

| Downregulated AS (IR) |                      |       |      |          |           |
|-----------------------|----------------------|-------|------|----------|-----------|
| Category              | Term                 | Count | %    | P-Value  | Benjamini |
| UP_KEYWORDS           | Alternative splicing | 321   | 71   | 2.40E-24 | 7.70E-22  |
| UP_SEQ_FEATURE        | splice variant       | 248   | 54.9 | 2.30E-16 | 2.80E-13  |
| UP_KEYWORDS           | Phosphoprotein       | 251   | 55.5 | 3.80E-15 | 6.30E-13  |
| GOTERM_MF_DIRECT      | protein binding      | 238   | 52.7 | 8.60E-07 | 4.60E-04  |
| GOTERM_CC_DIRECT      | nucleoplasm          | 96    | 21.2 | 1.90E-06 | 6.70E-04  |
| UP_KEYWORDS           | Coiled coil          | 96    | 21.2 | 1.70E-05 | 1.90E-03  |
| UP_KEYWORDS           | Cytoplasm            | 137   | 30.3 | 3.10E-05 | 2.50E-03  |
| UP_KEYWORDS           | Nucleus              | 146   | 32.3 | 4.30E-05 | 2.80E-03  |
| GOTERM_CC_DIRECT      | cytoplasm            | 149   | 33   | 5.30E-05 | 9.20E-03  |
| UP_KEYWORDS           | Methyltransferase    | 14    | 3.1  | 2.00E-04 | 1.10E-02  |

**D**

|                       | H3.3G34R-mutant  | Histone wildtype |
|-----------------------|------------------|------------------|
| Number of patients    | 4                | 8                |
| Grade                 | IV (4/4)         | IV (8/8)         |
| Location              | Hemisphere (4/4) | Hemisphere (8/8) |
| Sex                   | Female 2, Male 2 | Female 4, Male 4 |
| Mean age (Median age) | 14.85 (14.41)    | 14.12 (13.96)    |

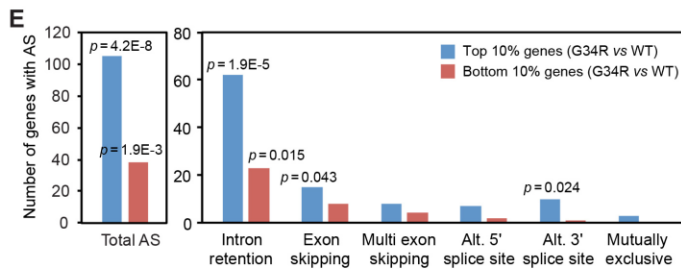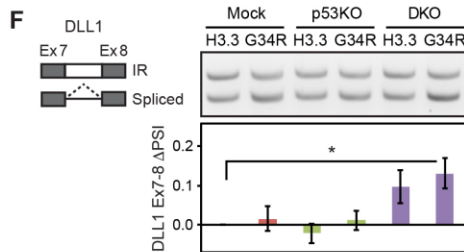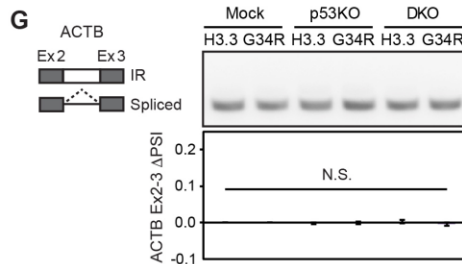

**Figure S4. Alternative RNA splicing events impacted by the mutations, related to Figure 4.**

(A) Volcano plots show alternative splicing events up- or down-regulated in DKO-G34R cells. (B) Motif analysis shows consensus splice acceptor and donor motifs at the intron retention sites down-regulated in triple-mutant vFNPCs (DKO-G34R). (C) Pathway analysis shows that most genes alternatively spliced in DKO-G34R cells are known targets of AS. (D) Clinical characteristics of H3.3G34R-mutant and age- and location-matched histone-wildtype HGGs used for AS analysis. (E) Bar graph shows overlaps between genes alternatively spliced in H3.3G34R-mutant tumors compared to histone-wildtype tumors ( $\Delta$ PSI > 10% and p value < 0.05) and genes differentially expressed in H3.3G34R-mutant tumors (top 10% and bottom 10% of genes sorted by the ratio of mean values). (F) RT-PCR confirms the changes of intron retention in *DLL1* in vFNPCs. Band intensity was quantified using Image J and Percentage Spliced In (PSI) values are shown in the bar charts. Bars indicate mean  $\pm$  S.E.M. (n = 3-5). (G) *ACTB* ( $\beta$ -actin) was used as a negative control. P values were calculated by hypergeometric test (E) or by two-sided paired t-test (F, G). \* $P$  < 0.05. NS, Not Significant. PSI, Percentage Spliced In.

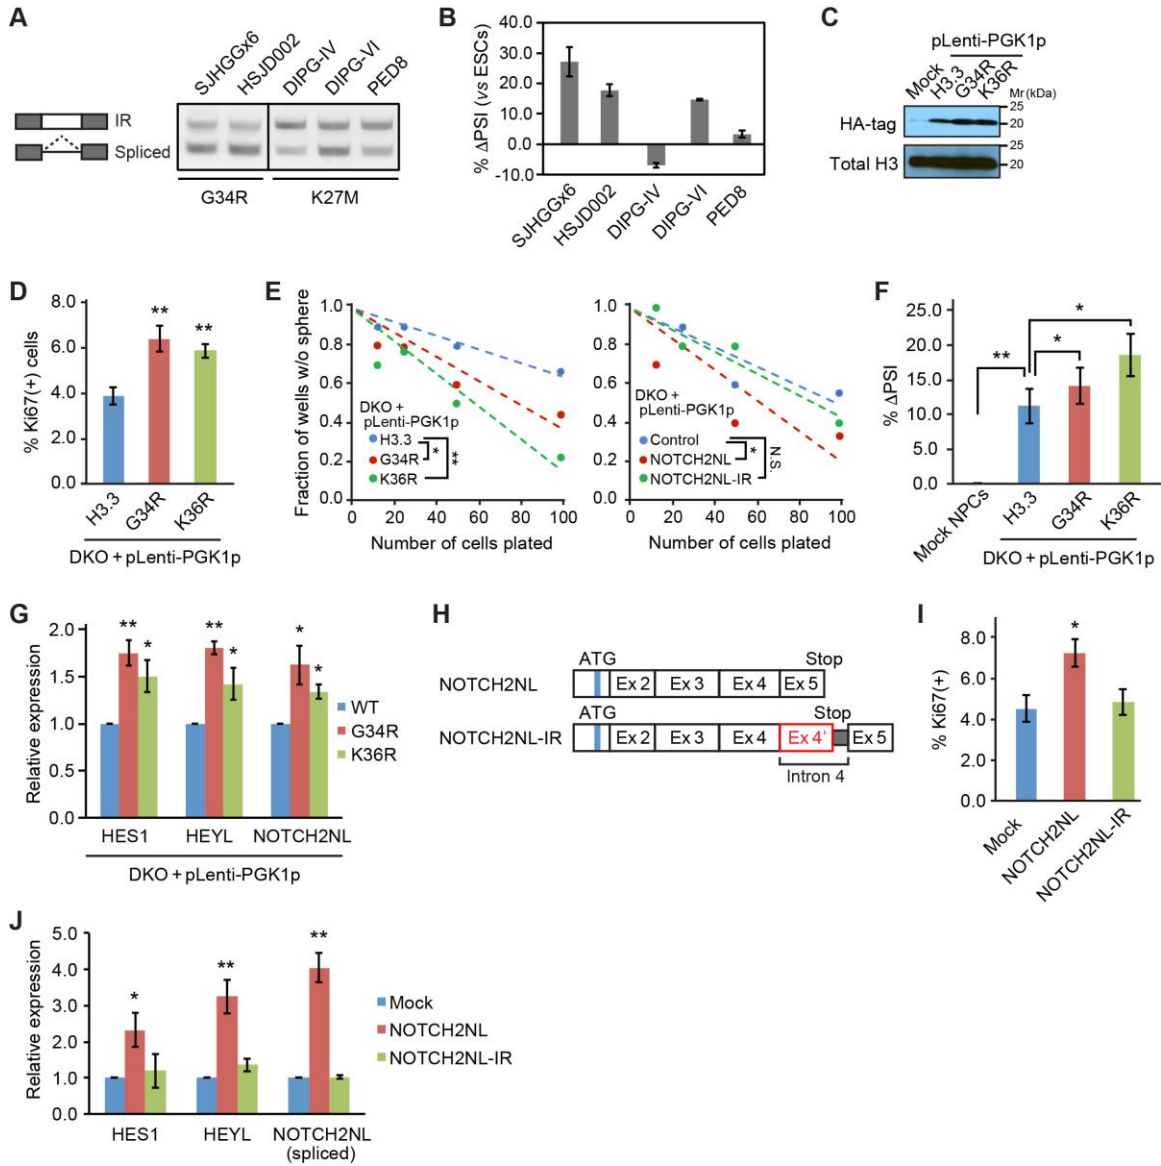



**Figure S5. Upregulation of the *NOTCH2NL* genes by the mutations, related to Figure 5.**

(A) H3.3G34R-mutant tumor cell lines (SJHGGx6 and HSJD002) show lower levels of intron retention of *NOTCH2NL* compared to K27M-mutant tumor cell lines (DIPG-IV, DIPG-VI, PED8). (B) Levels of alternative splicing were quantified by quantitative real-time RT-PCR using primer pairs specifically amplify spliced and unspliced transcripts, respectively. Bars indicate mean  $\pm$  S.E.M. (n = 3). (C) Western blotting of chromatin fraction shows the expression of the indicated histone transgenes and their chromatin incorporation. (D) Intracellular Flow Cytometry shows an increase of Ki67-positive cells by overexpression of H3.3G34R- and H3.3K36R-mutant transgenes. Bars indicate mean  $\pm$  S.E.M. (n = 5-6). (E) Limiting dilution assay shows an increase in sphere-forming capacity by overexpression of H3.3G34R- and H3.3K36R-mutant histones (Left panel) or the *NOTCH2NL* transgene (Right panel). Intron-retaining *NOTCH2NL* (*NOTCH2NL-IR*) shows no effect on sphere formation. (F) Quantitative RT-PCR shows altered splicing of *NOTCH2NL* intron 4 by expression of H3.3G34R- and H3.3K36R-mutant histone H3.3 transgenes. Bars indicate mean  $\pm$  S.E.M. (n = 5). (G) Quantitative RT-PCR shows an increase in the expression of Notch target genes *HES1* and *HEYL*. Bars indicate mean  $\pm$  S.E.M. (n = 3-4). (H) Schematic illustration of constructs expressing intron-excised and intron-retaining *NOTCH2NL* (*NOTCH2NL-IR*) transgenes. (I) Intracellular Flow Cytometry shows an increase of Ki67-positive cells by overexpression of *NOTCH2NL*, but not intron-retained *NOTCH2NL*. Bars indicate mean  $\pm$  S.E.M. (n = 3). (J) Quantitative RT-PCR shows an increase in the expression of Notch target genes *HES1* and *HEYL* by overexpression of *NOTCH2NL*, but not intron-retaining *NOTCH2NL*. Bars indicate mean  $\pm$  S.E.M. (n = 3). *P* values were calculated by two-sided Welch's t test (D, G, I and J), two-sided paired t-test (F) or by the likelihood-ratio test (E). \**P* < 0.05, \*\**P* < 0.01.

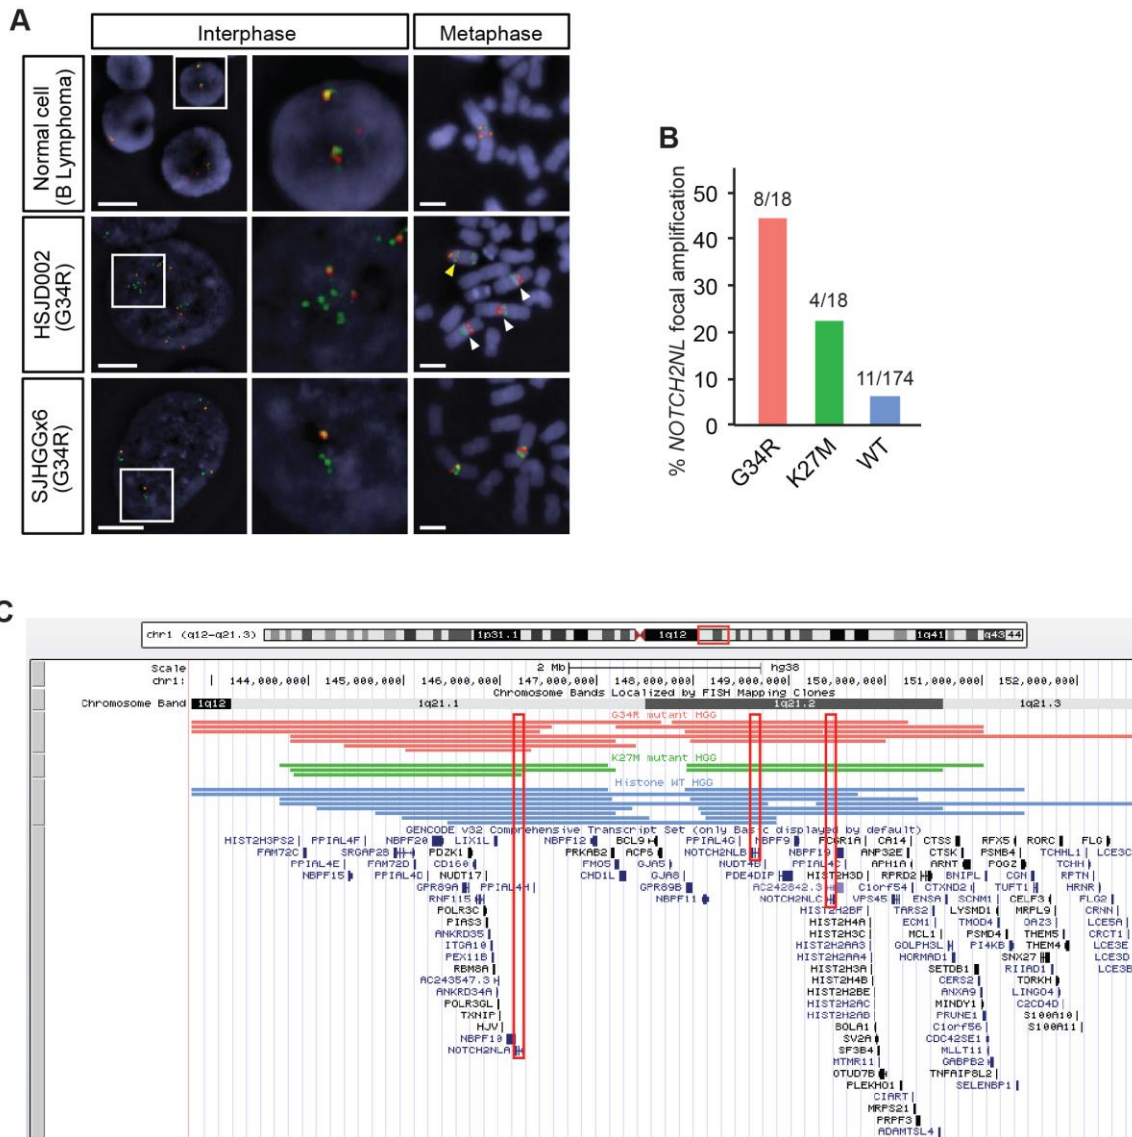

**Figure S6. *NOTCH2NL* amplification in H3.3G34R-mutant HGGs, related to Figure 6.**

(A) Fluorescent *in situ* hybridization (FISH) confirmed genomic amplification of *NOTCH2NL* locus (green) in two H3.3G34R-mutant patient-derived cell lines. FISH probe targeting *NOTCH2* locus is shown in red. Immortalized B lymphoma cells were used as control. Scale bar, 5  $\mu$ m. (B) The percentage ratio of tumors with *NOTCH2NL* focal amplification is shown for each tumor type (n = 210). (C) Focal amplifications associated with *NOTCH2NL* genes in each tumor type are mapped to the human genome (hg38).

**Table S1. Oligonucleotide sequences, related to STAR Methods**

| <b>Primer sequences for RT-qPCR</b>                        |                         |
|------------------------------------------------------------|-------------------------|
| HES1_Fw                                                    | ACGACACCGGATAAACCAAA    |
| HES1_Rv                                                    | TCAGCTGGCTCAGACTTTCA    |
| ASCL1_Fw                                                   | AGTTGGTCAACCTGGGCTTT    |
| ASCL1_Rv                                                   | AGCGCAGTGTCTCCACCTTA    |
| HEYL_Fw                                                    | AGACCGCATCAACAGTAGCC    |
| HEYL_Rv                                                    | TTTCAAGTGATCCACCGTCA    |
| TP53/p53_Fw                                                | AGGCCTTGGAACTCAAGGAT    |
| TP53/p53_Rv                                                | TTATGGCGGGAGGTAGACTG    |
| CDKN1A/p21_Fw                                              | GGAGACTCTCAGGGTCGAAA    |
| CDKN1A/p21_Rv                                              | GGATTAGGGCTTCCCTTTGG    |
| ATRX_Fw                                                    | GACACCCTTCATTGCAAGTTC   |
| ATRX_Rv                                                    | TTCCATCTGAGTCACGGCTA    |
| NOTCH2NL_Fw                                                | GGCAGACTGGTGACTTCACTT   |
| NOTCH2NL_Rv                                                | TCGTGTTCTTTTCCATTCCAG   |
| FOXG1_Fw                                                   | CAACGGCATCTACGAGTTCA    |
| FOXG1_Rv                                                   | TGTTGAGGGACAGATTGTGG    |
| SP8_Fw                                                     | GAGAGGAGGAGGGCACTTTT    |
| SP8_Rv                                                     | GCTGGGGCTGCCTATCTTAT    |
| ARX_Fw                                                     | GACACCCAGCTTTCATCAGC    |
| ARX_Rv                                                     | GGTGTGGGCTGTCTCAGG      |
| NKX6-1_Fw                                                  | ACACGAGACCCACTTTTTCCG   |
| NKX6-1_Rv                                                  | TGCTGGACTTGTGCTTCTTCAAC |
| HOXB2_Fw                                                   | TCTCCCCTAGCCTACAGGGTTC  |
| HOXB2_Rv                                                   | GGTGAAAAAATCCAGCTCTTCCT |
| DLX1_Fw                                                    | GGTCCAGCAAACCTCAGTACCT  |
| DLX1_Rv                                                    | CTTGAACCTGGATCGCTTGTTT  |
| DLX2_Fw                                                    | CCCTATGGAACCAGTTCGTC    |
| DLX2_Rv                                                    | TTGGCTTCCCGTTCACCTATC   |
| ID1_Fw                                                     | CCTCAACGGCGAGATCAG      |
| ID1_Rv                                                     | CGCTTCAGCGACACAAGA      |
| ACTB_Fw                                                    | GTCATTCCAAATATGAGATGCGT |
| ACTB_Rv                                                    | GCTATCACCTCCCCTGTGTG    |
| <b>Primer sequences for RT-PCR (Alternative Splicing)</b>  |                         |
| NOTCH2NL_Exon4_Fw                                          | TCTCCTGCAAATGCCTCAC     |
| NOTCH2NL_Exon5_Rv                                          | TACTCCATCAAAAAGCAAAAGCA |
| DLL3_Exon7_Fw                                              | GTAGATTGGAATCGCCCTGA    |
| DLL3_Exon8_Rv                                              | AGAGAGATGGGGTGAGAAAAA   |
| DLL1_Exon7_Fw                                              | ATAAGCCCTGCAAGAATGGA    |
| DLL1_Exon8_Rv                                              | CAGGGTGAAGAGCTGCAGTA    |
| ACTB_Exon2_Fw                                              | AAGACCTGTACGCCAACACA    |
| ACTB_Exon3_Rv                                              | AAAGCCATGCCAATCTCATC    |
| <b>Primer sequences for qRT-PCR (Alternative Splicing)</b> |                         |
| NOTCH2NL_spliced_Fw                                        | CTGCCTTCCAGAAACAGTGAG   |
| NOTCH2NL_spliced_Rv                                        | CATCGTGTCTTTTCCATTCC    |
| NOTCH2NL_IR_Fw                                             | TGCAACTGCCTTCCAGGT      |
| NOTCH2NL_IR_Rv                                             | ACACCCACTACCTCCTGTGCT   |
| DLL3_spliced_Fw                                            | GAGCTCGTCCGTAGATTGGA    |
| DLL3_spliced_Rv                                            | AGGCCTCCCGAGCGTAGA      |
| DLL3_IR_Fw                                                 | GCCAGAGCTTTTCCACTGAT    |

|                                         |                        |
|-----------------------------------------|------------------------|
| DLL3_IR_Rv                              | GCGTCAGGCCTAGAAACAAA   |
| <b>Primer sequences for ChIP-PCR</b>    |                        |
| NOTCH2NL_pair1_Fw                       | CCTCGGTCCTTCTCTGTGTG   |
| NOTCH2NL_pair1_Rv                       | ATGTCCAAACTCTCGGGAAC   |
| NOTCH2NL_pair2_Fw                       | TGCAACTGCCTTCCAGGT     |
| NOTCH2NL_pair2_Rv                       | ACACCCACTACCTCCTGTGCT  |
| LHX8_1st_Intron_Fw                      | AGAGAAAGGGCCTCAACTCC   |
| LHX8_1st_Intron_Rv                      | ACACTTTCTCATCGCCTGCT   |
| <b>Primer sequences for genomic PCR</b> |                        |
| NOTCH2NL_Fw                             | CACTCTGCGGTGGCAGTA     |
| NOTCH2NL_Rv                             | CCACCTTTCAGGTCCTAACATT |
| NOTCH2+NL_Fw                            | GCCTAGTCACACCAAATTCTCC |
| NOTCH2+NL_Rv                            | GTTGTAGAAAAGGGCATTCCAG |
| GAPDH_TSS_Fw                            | AATCCCCATCTCAGTCGTTT   |
| GAPDH_TSS_Rv                            | CAGCAGGACACTAGGGAGTCA  |
| <b>shRNA target sequences</b>           |                        |
| shNOTCH2NL #1                           | GAGCTCTGGGAAAGAGACAGG  |
| shNOTCH2NL #2                           | GGTTAATAAAGTGCTTTAAAC  |
